# Supplementary material for: Ultra-high-resolution 40 keV virtual monoenergetic imaging using spectral photon-counting CT in high-risk patients for coronary stenoses
Source: Springer Nature journal article supplement (doi:10.1007/s00330-024-11237-x), 2024-12-11
Supplement: MOESM1 [file 330_2024_11237_MOESM1_ESM.pdf]

# Ultra-high-resolution 40 keV virtual monoenergetic imaging using spectral photon-counting CT in high-risk patients for coronary stenoses

## ELECTRONIC SUPPLEMENTARY MATERIAL

**Supplemental Table 1.** Attenuation measurements in the aortic root, proximal and distal coronary arteries, along with signal-to-noise ratio (SNR) and contrast-to-noise ratio (CNR) values using epicardial fat as the background, for all reconstructions. SNR is defined as the attenuation divided by the noise. CNR is defined as the attenuation difference divided by the square root of the sum of the squared noise values.

| Parameter                                                 | 40 keV DECT   | 70 keV DECT  | 40 keV SPPCT  | 70 keV SPCCT |
|-----------------------------------------------------------|---------------|--------------|---------------|--------------|
| Aortic root attenuation (HU) $\pm$ sd                     | 1519 $\pm$ 30 | 457 $\pm$ 22 | 1355 $\pm$ 51 | 443 $\pm$ 44 |
| Aortic root SNR                                           | 56            | 23           | 29            | 11           |
| Aortic root CNR                                           | 45            | 20           | 23            | 10           |
| Proximal coronary artery attenuation (HU) $\pm$ sd        | 1658 $\pm$ 86 | 409 $\pm$ 13 | 1205 $\pm$ 75 | 402 $\pm$ 54 |
| Proximal coronary artery SNR                              | 30            | 13           | 20            | 8            |
| Proximal coronary artery CNR                              | 27            | 13           | 16            | 8            |
| Distal coronary artery attenuation (HU) $\pm$ sd          | 906 $\pm$ 81  | 314 $\pm$ 38 | 1205 $\pm$ 84 | 354 $\pm$ 55 |
| Distal coronary artery SNR                                | 20            | 13           | 22            | 8            |
| Distal coronary artery CNR                                | 18            | 12           | 15            | 8            |
| Epicardial fat attenuation (HU)                           | -165 $\pm$ 25 | -93 $\pm$ 21 | -54 $\pm$ 43  | -86 $\pm$ 41 |
| DECT, dual-energy CT; SPCCT, spectral photon-counting CT. |               |              |               |              |

**Supplemental Table 2.** Median and [IQR] quality scores for the two readers

| Parameter                                                                                       | 40 keV DECT   | 70 keV DECT | 40 keV SPPCT | 70 keV SPCCT |
|-------------------------------------------------------------------------------------------------|---------------|-------------|--------------|--------------|
| <b>Reader 1</b>                                                                                 |               |             |              |              |
| Proximal lumen                                                                                  | 4 [4, 5]      | 5 [4, 5]    | 5 [5, 5]     | 4.5 [4, 5]   |
| Distal lumen                                                                                    | 4 [3, 4]      | 4 [3, 4]    | 5 [4.25, 5]  | 4 [4, 4]     |
| Lumen sharpness                                                                                 | 4 [4, 5]      | 4 [4, 5]    | 5 [4.25, 5]  | 5 [4, 5]     |
| Lumen conspicuity                                                                               | 5 [5, 5]      | 4 [4, 5]    | 5 [5, 5]     | 5 [5, 5]     |
| Coronary wall                                                                                   | 4 [3, 4]      | 4 [4, 5]    | 5 [5, 5]     | 5 [4, 5]     |
| Calcified plaque                                                                                | 3 [3, 4]      | 4 [4, 5]    | 5 [4.5, 5]   | 5 [5, 5]     |
| Non-calcified plaque                                                                            | 4 [3, 4]      | 5 [4.5, 5]  | 5 [4.5, 5]   | 5 [4, 5]     |
| Image noise                                                                                     | 4 [4, 4]      | 4 [4, 4]    | 5 [5, 5]     | 5 [4, 5]     |
| Overall quality                                                                                 | 4 [3, 4]      | 4 [4, 5]    | 5 [5, 5]     | 5 [4.25, 5]  |
| Diagnostic confidence                                                                           | 4 [3, 4.75]   | 5 [4, 5]    | 5 [5, 5]     | 5 [5, 5]     |
| <b>Reader 2</b>                                                                                 |               |             |              |              |
| Proximal lumen                                                                                  | 4 [4, 5]      | 4.5 [4, 5]  | 5 [4.25, 5]  | 5 [4, 5]     |
| Distal lumen                                                                                    | 3.5 [2.25, 4] | 5 [5, 5]    | 5 [5, 5]     | 4 [4, 4]     |
| Lumen sharpness                                                                                 | 3 [3, 4]      | 4 [3.25, 5] | 5 [4.25, 5]  | 5 [4, 5]     |
| Lumen conspicuity                                                                               | 5 [5, 5]      | 4 [4, 5]    | 5 [5, 5]     | 5 [5, 5]     |
| Coronary wall                                                                                   | 4 [3, 4]      | 4 [3.25, 5] | 5 [5, 5]     | 5 [4, 5]     |
| Calcified plaque                                                                                | 3 [3, 4]      | 4 [4, 5]    | 5 [4.5, 5]   | 5 [5, 5]     |
| Non-calcified plaque                                                                            | 4 [4, 5]      | 5 [4., 5]   | 5 [4.5, 5]   | 5 [4.5, 5]   |
| Image noise                                                                                     | 4 [3.25, 4]   | 4 [4, 4]    | 5 [5, 5]     | 5 [4, 5]     |
| Overall quality                                                                                 | 4 [3, 4]      | 4 [4, 5]    | 5 [5, 5]     | 5 [4.25, 5]  |
| Diagnostic confidence                                                                           | 4 [3, 4]      | 5 [4, 5]    | 5 [5, 5]     | 5 [5, 5]     |
| DECT, dual-energy CT; SPCCT, spectral photon-counting CT. Data are in percentages with [95% CI] |               |             |              |              |
